# Supplementary material for: High temperature and oil tolerance of surfactant foam/polymer–surfactant foam
Source: Royal Society of Chemistry journal article supplement (doi:10.1039/c4ra17216g), 2015-01-01
Supplement: c4ra17216g1.pdf [file c4ra17216g1.pdf]

Partial results of the early research on the screening of surfactant foam and polymer-surfactant foam. The experiments were conducted at 90 °C and the method was the same as section 2.2.

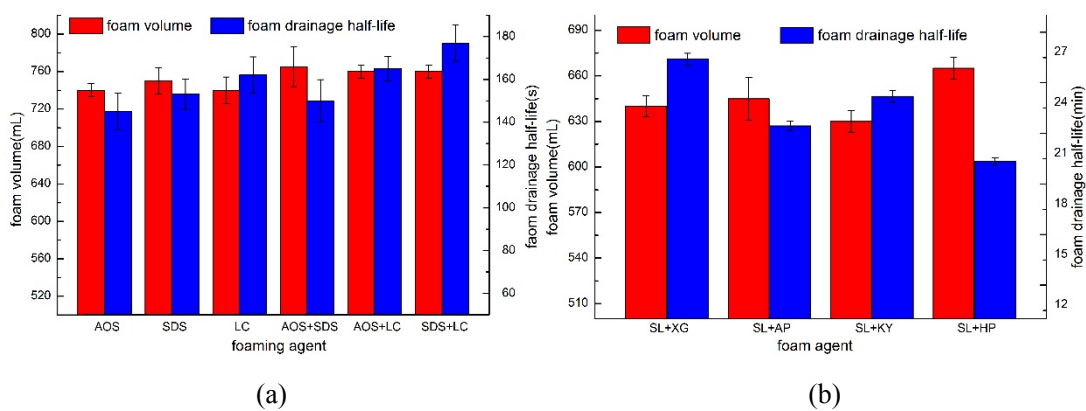

**Fig. 1** Foam properties for various foam solutions. (a) Surfactant foam solutions of which total concentration was 0.15 wt%, (b) Polymer-surfactant foam solutions of which polymer concentration and surfactant concentration were both 0.15 wt%.
